# Supplementary material
Source: publisher figshare collection journal article supplement (https://springernature.figshare.com/ndownloader/files/12751577)
Supplement: Supplementary file 1 [file 12751577]

a

|                 |                                                                       |
|-----------------|-----------------------------------------------------------------------|
| Parthenogenetic | gattcgcttcttggatcttggcggtgttgtgaacagtcgctgcattttcaactgcttta           |
| Male            | -----cttcttggatcttggcggtgttgtgaacagtcgctgcattttcaactgcttta            |
| Female          | -----aacagtcgctgcattttcaactgcttta<br>*****                            |
| Parthenogenetic | accatggctcctattctcggtactgggacattcgtggactggcacagccaatccgctg            |
| Male            | accatggctcctattctcggtactgggacattcgtggactggcacagccaatccgctg            |
| Female          | accatggctcctattctcggtactgggacattcgtggactggcacagccaatccgctg<br>*****   |
| Parthenogenetic | ctgcttgcccacgctgacgtcaaggtggaggacaagcgctactcatgcggaacccctccg          |
| Male            | ctgcttgcccacgctgacgtcaaggtggaggacaagcgctactcatgcggaacccctccg          |
| Female          | ctgcttgcccacgctgacgtcaaggtggaggacaagcgctactcatgcggaacccctccg<br>***** |
| Parthenogenetic | gattttgaccgcagcgctgggtcaaggagaaacacaccctgggcctggagttccccaac           |
| Male            | gattttgaccgcagcgctgggtcaaggagaaacacaccctgggcctggagttccccaac           |
| Female          | gattttgaccgcagcgctgggtcaaggagaaacacaccctgggcctggagttccccaac<br>*****  |
| Parthenogenetic | ctgccttactacattgatggggacgtgaagctcaccagagcatggctattctgcgctac           |
| Male            | ctgccttactacattgatggggacgtgaagctcaccagagcatggctattctgcgctac           |
| Female          | ctgccttactacattgatggggacgtgaagctcaccagagcatggctattctgcgctac<br>*****  |
| Parthenogenetic | cttgcccgcaagcatggactggatggcaagacagaggccgaaaagcaacgggtcgacgtc          |
| Male            | cttgcccgcaagcatggactggatggcaagacagaggccgaaaagcaacgggtcgacgtc          |
| Female          | cttgcccgcaagcatggactggatggcaagacagaggccgaaaagcaacgggtcgacgtc<br>***** |
| Parthenogenetic | acggagcagcagtttgccgacttccgcatgaactgggttcgcatgtgctacaaccagac           |
| Male            | acggagcagcagtttgccgacttccgcatgaactgggttcgcatgtgctacaaccagac           |
| Female          | acggagcagcagtttgccgacttccgcatgaactgggttcgcatgtgctacaaccagac<br>*****  |
| Parthenogenetic | tttgacaagctcaaggtcgactacctcaagaacttgccagatgcgctgaagagcttctca          |
| Male            | tttgacaagctcaaggtcgactacctcaagaacttgccagatgcgctgaagagcttctca          |
| Female          | tttgacaagctcaaggtcgactacctcaagaacttgccagatgcgctgaagagcttctca<br>***** |
| Parthenogenetic | gagtaccttggaagcacaagttcttcgctggcgaccatgtcacctacgttgacttcac            |
| Male            | gagtaccttggaagcacaagttcttcgctggcgaccatgtcacctacgttgacttcac            |
| Female          | gagtaccttggaagcacaagttcttcgctggcgaccatgtcacctacgttgacttcac<br>*****   |
| Parthenogenetic | gcttacgagatgctgggtcagcacctcctctttgctccggactgcctgaaggatttcccc          |
| Male            | gcttacgagatgctgggtcagcacctcctctttgctccggactgcctgaaggatttcccc          |
| Female          | gcttacgagatgctgggtcagcacctcctctttgctccggactgcctgaaggatttcccc<br>***** |
| Parthenogenetic | aacctgaaggcctttgtggaccgcgttgaggctctccccacgtggcggcctacctgaag           |
| Male            | aacctgaaggcctttgtggaccgcgttgaggctctccccacgtggcggcctacctgaag           |
| Female          | aacctgaaggcctttgtggaccgcgttgaggctctccccacgtggcggcctacctgaag<br>*****  |
| Parthenogenetic | tctgacaagtgcacagctggccctcaacggcgacatggctagcttcggcagcaggctg            |
| Male            | tctgacaagtgcacagctggccctcaacggcgacatggctagcttcggcagcaggctg            |
| Female          | tctgacaagtgcacagctggccctcaacggcgacatggctagcttcggcagcaggctg<br>*****   |
| Parthenogenetic | cagaagaagccgtgaacagcacttcataccactgtccgctttggcgtttgcttcccc             |
| Male            | cagaagaagccgtgaacagcacttcataccactgtccgctttggcgtttgcttcccc             |
| Female          | cagaagaagccgtgaacagcacttcataccactgtccgctttggcgtttgcttcccc<br>*****    |
| Parthenogenetic | caataaagtttttccggtggtgcaggtcc                                         |
| Male            | caataaagttt-----                                                      |
| Female          | caataaagtttttccggtggtgc-----<br>*****                                 |
