# Supplementary material
Source: publisher figshare collection journal article supplement (https://springernature.figshare.com/ndownloader/files/12751577)
Supplement: Supplementary file 2 [file 12751577]

**b**

|                 |                                                                                |
|-----------------|--------------------------------------------------------------------------------|
| Parthenogenetic | gagttgtgctcgatcaagctacc <b>atg</b> gccctgtgctgggatactgggacatccgagggc           |
| Male            | -agttgtgctcgatcaagctacc <b>atg</b> gccctgtgctgggatactgggacatccgagggc           |
| Female          | -----agctacc <b>atg</b> gccctgtgctgggatactgggacatccgagggc<br>*****             |
| Parthenogenetic | tttgcgagcccatttcgctaccttctggcgcacgctaaagtctcctacgaggataaaaggt                  |
| Male            | tttgcgagcccatttcgctaccttctggcgcacgctaaagtctcctacgaggataaaaggt                  |
| Female          | tttgcgagcccatttcgctaccttctggcgcacgctaaagtctcctacgaggataaaaggt<br>*****         |
| Parthenogenetic | acggcttcggcaatggtcccgaaaccagccgcgacgagtgggtggccgacaagtacaagt                   |
| Male            | acggcttcggcaatggtcccgaaaccagccgcgacgagtgggtggccgacaagtacaagt                   |
| Female          | acggcttcggcaatggtcccgaaaccagccgcgacgagtgggtggccgacaagtacaagt<br>*****          |
| Parthenogenetic | tgggtctggacttccccaacgtgccgtactacatcgacggcgacgtcaagctgacgcaga                   |
| Male            | tgggtctggacttccccaacgtgccgtactacatcgacggcgacgtcaagctgacgcaga                   |
| Female          | tgggtctggacttccccaacgtgccgtactacatcgacggcgacgtcaagctgacgcaga<br>*****          |
| Parthenogenetic | gcatggccatcctgcagtacctcggccgcaagcacggactcgccccaaggacgaggcca                    |
| Male            | gcatggccatcctgcagtacctcggccgcaagcacggactcgccccaaggacgaggcca                    |
| Female          | gcatggccatcctgcagtacctcggccgcaagcacggactcgccccaaggacgaggcca<br>*****           |
| Parthenogenetic | ctcagctccgcgtcgacgtgctccagctcacggcggttcgacgtgatcatgtgggcagtgc                  |
| Male            | ctcagctccgcgtcgacgtgctccagctcacggcggttcgacgtgatcatgtgggcagtgc                  |
| Female          | ctcagctccgcgtcgacgtgctccagctcacggcggttcgacgtgatcatgtgggcagtgc<br>*****         |
| Parthenogenetic | gcgtctgtctacgaccccgagtacaccgaggagaagcggaagcagttcctggtcgacgtgg                  |
| Male            | gcgtctgtctacgaccccgagtacaccgaggagaagcggaagcagttcctggtcgacgtgg                  |
| Female          | gcgtctgtctacgaccccgagtacaccgaggagaagcggaagcagttcctggtcgacgtgg<br>*****         |
| Parthenogenetic | ccgacaagctgaagcagtttgactcgtacctctccaagtatggtcctttcggcgccggca                   |
| Male            | ccgacaagctgaagcagtttgactcgtacctctccaagtatggtcctttcggcgccggca                   |
| Female          | ccgacaagctgaagcagtttgactcgtacctctccaagtatggtcctttcggcgccggca<br>*****          |
| Parthenogenetic | agtcagccacttacgtcgacttcttgctctacgaggctctccagatcgtgaaaattcttg                   |
| Male            | agtcagccacttacgtcgacttcttgctctacgaggctctccagatcgtgaaaattcttg                   |
| Female          | agtcagccacttacgtcgacttcttgctctacgaggctctccagatcgtgaaaattcttg<br>*****          |
| Parthenogenetic | gccaagcacgttccgcaagggtaccctcagctcgaggagtactgccagcgcggttgctg                    |
| Male            | gccaagcacgttccgcaagggtaccctcagctcgaggagtactgccagcgcggttgctg                    |
| Female          | gccaagcacgttccgcaagggtaccctcagctcgaggagtactgccagcgcggttgctg<br>*****           |
| Parthenogenetic | cccttcgggaatgaaggagtatctggcctcggatcgcttcaaggcttggcccatctgga                    |
| Male            | cccttcgggaatgaaggagtatctggcctcggatcgcttcaaggcttggcccatctgga                    |
| Female          | cccttcgggaatgaaggagtatctggcctcggatcgcttcaaggcttggcccatctgga<br>*****           |
| Okayama         | gcccgtacgcaaaggcgctggcggcgcagcacaaagccgccgctgacgactgc <b>tga</b> gcga          |
| Male            | gcccgtacgcaaaggcgctggcggcgcagcacaaagccgccgctgacgactgc <b>tga</b> gcga          |
| Female          | gcccgtacgcaaaggcgctggcggcgcagcacaaagccgccgctgacgactgc <b>tga</b> gcga<br>***** |
| Parthenogenetic | tccccgcgggccatcgcgcgctcgcaagcgttgaccgcagttctagttttttgatgttgtt                  |
| Male            | tccccgcgggccatcgcgcgctcgcaagcgttgaccgcagttctagttttttgatgttgtt                  |
| Female          | tccccgcgggccatcgcgcgctcgcaagcgttgaccgcagttctagttttttgatgttgtt<br>*****         |
| Parthenogenetic | aatctgggatgcgacgctatatacggctgttacatttttcttttcaataaacggttgctg                   |
| Male            | aatctgggatgcgacgctatatacggctgttacatttttcttttcaataaacggttgctg                   |
| Female          | aatctgggatgcgacgctatatacggctgttacatttttcttttcaataaacggttgctg<br>*****          |
| Parthenogenetic | cgttttgagcgctcttccgacaaaaaaaa                                                  |
| Male            | -----                                                                          |
| Female          | cgttttgagcgctcttccgac-----                                                     |
